# Supplementary material for: Targeting the Tumor Microenvironment through mTOR Inhibition and Chemotherapy as Induction Therapy for Locally Advanced Head and Neck Squamous Cell Carcinoma: The CAPRA Study
Source: MDPI journal article supplement (doi:10.3390/cancers14184509), 2022-09-17
Supplement: s1 [file s1]

**Table S1.** Patient demographics and baseline characteristics of patients treated at the dose of 30 mg/week of everolimus.

| <b>Characteristics</b>               |            |
|--------------------------------------|------------|
| <b>Number of patients enrolled</b>   | N=3        |
| <b>Age, median (year); [range]</b>   | 61 [55-62] |
| <b>Gender, n (%)</b>                 |            |
| Male                                 | 3 (100)    |
| <b>WHO performance status, n (%)</b> |            |
| 0                                    | 2 (66.7)   |
| 1                                    | 1 (33.3)   |
| <b>Disease stage, n (%)</b>          |            |
| IVa                                  | 2 (66.7)   |
| IVb                                  | 1 (33.3)   |
| <b>T stage, n (%)</b>                |            |
| 2                                    | 2 (66.7)   |
| 4a                                   | 1 (33.3)   |
| <b>N stage, n (%)</b>                |            |
| 2b                                   | 1 (33.3)   |
| 2c                                   | 1 (33.3)   |
| 3                                    | 1 (33.3)   |
| <b>Primary site, n (%)</b>           |            |
| Oropharynx                           | 2 (66.7)   |
| Oral cavity                          | 1 (33.3)   |
